# Supplementary material for: Dietary Patterns, Dietary Interventions, and Mammographic Breast Density: A Systematic Literature Review
Source: MDPI journal article supplement (doi:10.3390/nu14245312), 2022-12-14
Supplement: s1 [file s1]

**Supplementary Table S1.** Results of analyses stratified by body mass index (BMI), smoking status, and ethnicity, in the studies reporting on the association between *a priori*- or *a posteriori*-defined dietary patterns and mammographic breast density.

| Author, year        | Study population                        | Dietary pattern                                          | Summary of results <sup>(a)</sup>                                                                                             |
|---------------------|-----------------------------------------|----------------------------------------------------------|-------------------------------------------------------------------------------------------------------------------------------|
| Castellò, 2016[17]  | BMI < 25 (n=1015)                       | Adherence to Western dietary pattern (a priori)          | OR 0.98 (0.70 - 1.39) for 4 <sup>th</sup> vs. 1 <sup>st</sup> quartiles                                                       |
|                     | BMI ≥ 25 (n=2533)                       |                                                          | OR 1.41 (1.13 - 1.76) for 4 <sup>th</sup> vs. 1 <sup>st</sup> quartiles                                                       |
| Castellò, 2015[18]  | Non smoker or former +6 months (n=2180) | Compliance with the WCRF/AICR recommendations (a priori) | OR 0.64 (0.47 - 0.87) for highest vs. lowest scores<br>OR 0.87 (0.80 - 0.96) for 1-unit increment                             |
|                     | Smoker or former <6 months (n=1370)     |                                                          | OR 1.05 (0.73 - 1.49) for highest vs. lowest scores<br>OR 1.01 (0.91 - 1.12) for 1-unit increment                             |
| Voevodina, 2013[19] | Smoker (n=51)                           | Mediterranean dietary score (a priori)                   | OR 0.97 (0.80 - 1.19) for 1-unit increment                                                                                    |
|                     | Non-smokers (n=369)                     |                                                          | OR 0.95 (0.90 - 0.999) for 1-unit increment                                                                                   |
| Tseng, 2008[20]     | Non-smokers (n=1110)                    | Mediterranean Diet Scale (a priori)                      | $\beta$ 0.13 for highest vs. lowest category, p-value 0.90<br>$\beta$ -0.08 for 1-unit increment, p-value 0.72                |
|                     | Current smokers (n=176)                 |                                                          | $\beta$ -7.17 for highest vs. lowest category, p-value 0.01<br>$\beta$ -1.68 for 1-unit increment, p-value 0.002              |
|                     | Non-smokers (n=1110)                    | Revised Mediterranean Diet Score (a priori)              | $\beta$ -0.58 highest vs. lowest category, p-value 0.59<br>$\beta$ -0.12 for 1-unit increment, p-value 0.58                   |
|                     | Current smokers (n=176)                 |                                                          | $\beta$ -8.07 for highest vs. lowest category, p-value 0.004<br>$\beta$ -1.90 for 1-unit increment, p-value 0.0005            |
| Tseng, 2008[21]     | Current smoker (n=176)                  | Fruit-vegetable-cereal (a posteriori)                    | mean MBD 25.0% vs. 31.4% for 5 <sup>th</sup> vs. 1 <sup>st</sup> quintile<br>$\beta$ -0.30 for 1-unit increment, p-value 0.02 |

|                  |                        |                                           |                                                                                                                             |
|------------------|------------------------|-------------------------------------------|-----------------------------------------------------------------------------------------------------------------------------|
|                  | Non-smokers (n=1110)   |                                           | mean MBD 23.7 vs. 23.4 for 5 <sup>th</sup> vs. 1 <sup>st</sup> quintile<br>$\beta$ 0.03 for 1-unit increment, p-value 0.48  |
|                  | Current smoker (n=176) | Salad-sauce-pasta/grain<br>(a posteriori) | mean MBD 22.4 vs. 26.4 for 5 <sup>th</sup> vs. 1 <sup>st</sup> quintile<br>$\beta$ -0.27 for 1-unit increment, p-value 0.06 |
|                  | Non-smokers (n=1110)   |                                           | mean MBD 24.4 vs. 23.4 for 5 <sup>th</sup> vs. 1 <sup>st</sup> quintile<br>$\beta$ 0.03 for 1-unit increment, p-value 0.48  |
|                  | Current smoker (n=176) | Meat-starch<br>(a posteriori)             | mean MBD 28.4 vs. 24.0 for 5 <sup>th</sup> vs. 1 <sup>st</sup> quintile<br>$\beta$ 0.14 for 1-unit increment, p-value 0.18  |
|                  | Non-smokers (n=1110)   |                                           | mean MBD 25.8 vs. 23.9 for 5 <sup>th</sup> vs. 1 <sup>st</sup> quintile<br>$\beta$ 0.04 for 1-unit increment, p-value 0.40  |
| Takata, 2007[22] | Caucasians (n=1046)    | Vegetables<br>(a posteriori)              | mean MBD 34.2% vs. 29.7% 4 <sup>th</sup> vs. 1 <sup>st</sup> quartile, p-trend 0.18                                         |
|                  | Japanese (n=1638)      |                                           | mean MBD 33.7% vs. 38.1% 4 <sup>th</sup> vs. 1 <sup>st</sup> quartile, p-trend 0.13                                         |
|                  | Caucasians (n=1046)    | Fruit and milk<br>(a posteriori)          | mean MBD 33.1% vs. 32.5% 4 <sup>th</sup> vs. 1 <sup>st</sup> quartile, p-trend 0.74                                         |
|                  | Japanese (n=1638)      |                                           | mean MBD 37.0% vs. 37.8% 4 <sup>th</sup> vs. 1 <sup>st</sup> quartile, p-trend 0.61                                         |
|                  | Caucasians (n=1046)    | Fat and meat<br>(a posteriori)            | mean MBD 31.9% vs. 29.9% 4 <sup>th</sup> vs. 1 <sup>st</sup> quartile, p-trend 0.84                                         |
|                  | Japanese (n=1638)      |                                           | mean MBD 38.1% vs. 34.3% 4 <sup>th</sup> vs. 1 <sup>st</sup> quartile, p-trend 0.22                                         |

<sup>(a)</sup> Most adjusted results and corresponding 95% confidence intervals were reported whenever available. WCRF/AICR: World Cancer Research Fund/American Institute for Cancer Research. MBD: mammographic breast density.
