# Supplementary material for: Dietary Patterns, Dietary Interventions, and Mammographic Breast Density: A Systematic Literature Review
Source: Nutrients. 2022 Dec 14;14(24):5312. doi: 10.3390/nu14245312 (PMC9781545; doi:10.3390/nu14245312)
Supplement: Supplementary file 1 [file nutrients-14-05312-s001.zip › Supplementary File S1.xls]

## Sheet: cohort
First Author		Garzia (2021) [25]	Mishra (2011) [26]
1	Were the two groups similar and recruited from the same population?	Yes	Yes
2	Were the exposures measured similarly to assign people to both exposed and unexposed groups?	Yes	Yes
3	Was the exposure measured in a valid and reliable way?	Yes	Yes
4	Were confounding factors identified?	Yes	Yes
5	Were strategies to deal with confounding factors stated?	Yes	No
6	Were the groups/participants free of the outcome at the start of the study (or at the moment of exposure)?	(NA)	(NA)
7	Were the outcomes measured in a valid and reliable way?	Yes	Yes
8	Was the follow up time reported and sufficient to be long enough for outcomes to occur?	Yes	Yes
9	Was follow up complete, and if not, were the reasons to loss to follow up described and explored?	Yes	Yes
10	Were strategies to address incomplete follow up utilized?	Yes	Yes
11	Was appropriate statistical analysis used?	Yes	Yes
Reviewer		EP / MF	EP / MF

## Sheet: cross-sectional
First Author (year)		Castelló (2015) [17]	Castelló (2016) [18]	Voevodina (2013) [19]	Tseng (2007) [20]	Tseng (2008) [21]	Takata (2007) [22]
1	Were the criteria for inclusion in the sample clearly defined?	Yes	Yes	Yes	Yes	Yes	Yes
2	Were the study subjects and the setting described in detail?	Yes	Yes	Yes	Yes	Yes	Yes
3	Was the exposure measured in a valid and reliable way?	Yes	Yes	Yes	Yes	Yes	Yes
4	Were objective, standard criteria used for measurement of the condition?	No	No	No	Yes	Yes	No
5	Were confounding factors identified?	Yes	Yes	Yes	Yes	Yes	Yes
6	Were strategies to deal with confounding factors stated?	Yes	Yes	Yes	Yes	Yes	Yes
7	Were the outcomes measured in a valid and reliable way?	Yes	Yes	Yes	Yes	Yes	Yes
8	Was appropriate statistical analysis used?	Yes	Yes	Yes	Yes	Yes	Yes
Reviewer		EP / MF	EP / MF	EP / MF	EP / MF	EP / MF	EP / MF

## Sheet: RCT
First Author (year)		Dorgan (2010) [29]	Masala (2019) [8]	Boyd (1997) [30]	Martin (2009) [31]
1	Was true randomization used for assignment of participants to treatment groups?	Yes	Yes	Yes	Yes
2	Was allocation to treatment groups concealed?	(NA)	(NA)	(NA)	(NA)
3	Were treatment groups similar at the baseline?	Yes	Yes	Yes	Yes
4	Were participants blind to treatment assignment?	(NA)	(NA)	(NA)	(NA)
5	Were those delivering treatment blind to treatment assignment?	(NA)	(NA)	(NA)	(NA)
6	Were outcomes assessors blind to treatment assignment?	Yes	Yes	Unclear	Yes
7	Were treatment groups treated identically other than the intervention of interest?	Yes	Yes	Yes	Yes
8	Was follow up complete and if not, were differences between groups in terms of their follow up adequately described and analyzed?	Yes	Yes	Yes	Unclear
9	Were participants analyzed in the groups to which they were randomized?	Unclear	Yes	Yes	Unclear
10	Were outcomes measured in the same way for treatment groups?	Yes	Yes	Yes	Yes
11	Were outcomes measured in a reliable way?	Yes	Yes	Yes	Yes
12	Was appropriate statistical analysis used?	Yes	Yes	Yes	Yes
13	Was the trial design appropriate, and any deviations from the standard RCT design (individual randomization, parallel groups) accounted for in the conduct and analysis of the trial?	Yes	Yes	Yes	Yes
Reviewer		EP / MF	EP / MF	EP / MF	EP / MF
